# Supplementary material for: Insect Feeding on Sorghum bicolor Pollen and Hymenoptera Attraction to Aphid-Produced Honeydew
Source: MDPI journal article supplement (doi:10.3390/insects13121152), 2022-12-14
Supplement: s1 [file s1]

Supplemental Data.

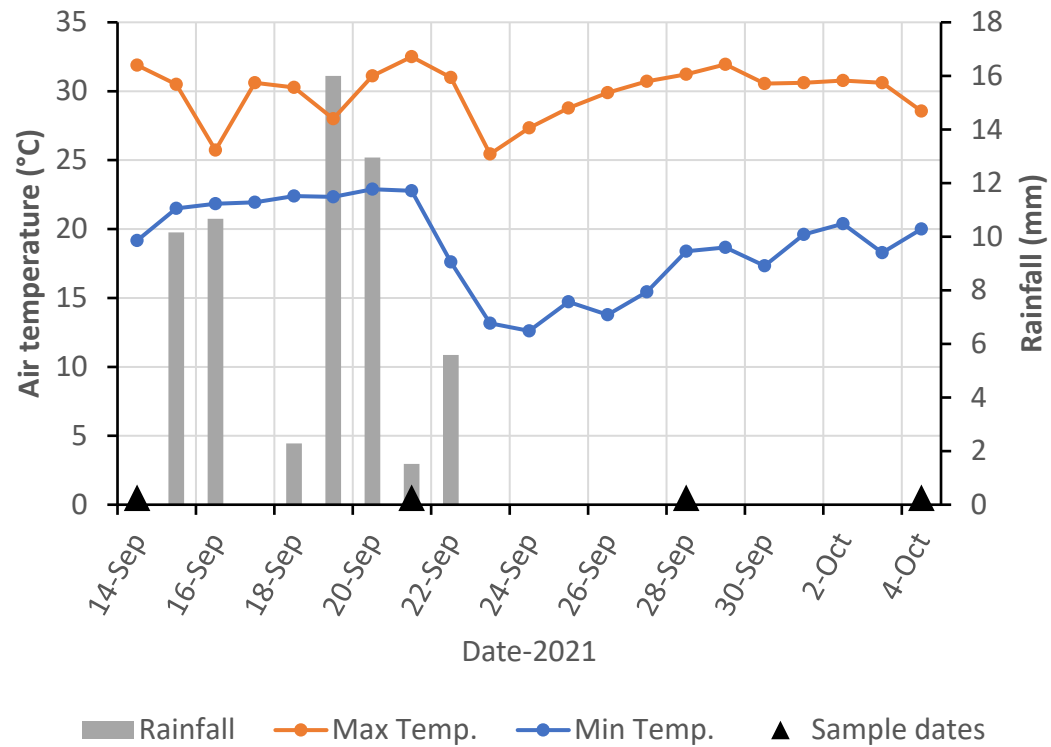

**Supplemental Figure S1.** Daily rainfall and maximum and minimum air temperatures during the study period in Tifton, GA in 2021. Data from the University of Georgia Weather Network ([weather.uga.edu](http://weather.uga.edu)), Tifton station. Insect sampling dates are indicated by black triangles.

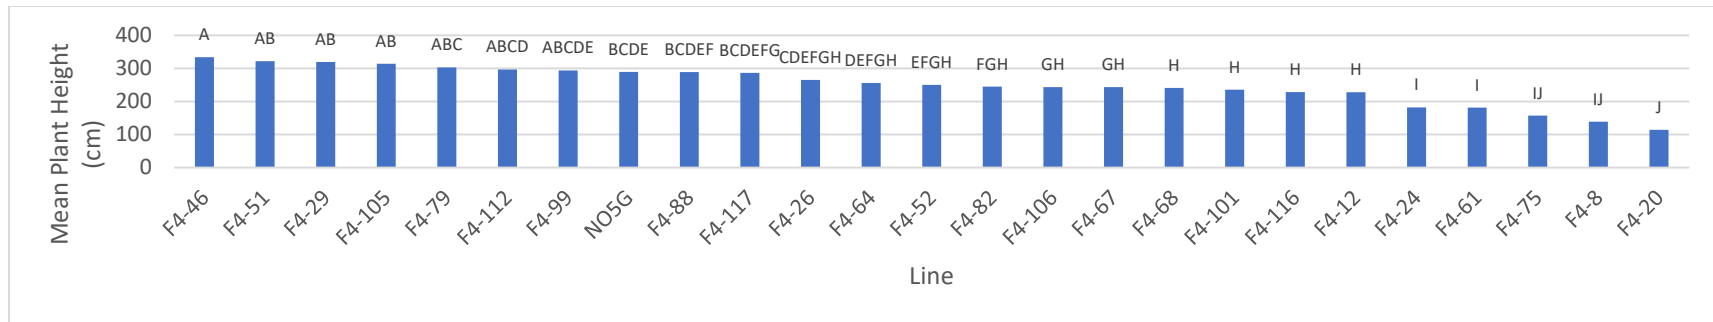

**Supplemental Figure S2.** Plant height for the N109A x PI 257599 F<sub>4</sub> sorghum lines grown at Tifton, GA 2021. NO5G is PI 257599 (the common name is No. 5 Gambela). Means with the same letter are not different at  $\alpha = 0.05$ .

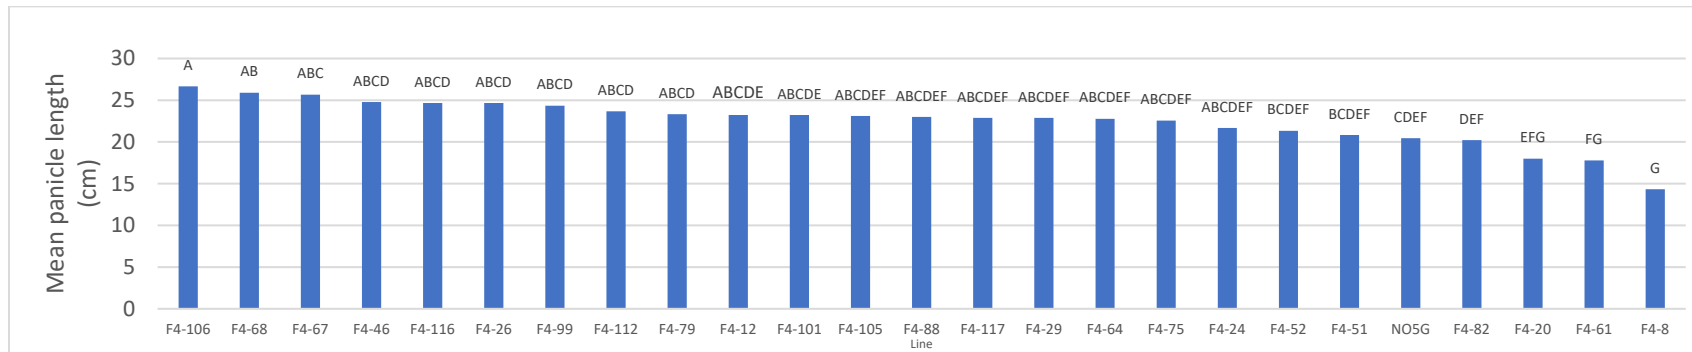

**Supplemental Figure S3.** Mean panicle length for the N109A x PI 257599 F<sub>4</sub> sorghum lines grown at Tifton, GA 2021. NO5G is PI 257599 (the common name is No. 5 Gambela). Means with the same letter are not different at  $\alpha = 0.05$ .
